# Supplementary material for: Utilizing Protein–Peptide Hybrid Microarray for Time-Resolved Diagnosis and Prognosis of COVID-19
Source: MDPI journal article supplement (doi:10.3390/microorganisms11102436), 2023-09-28
Supplement: s1 [file s1]

# Supplementary Materials for

## Utilizing Protein–Peptide Hybrid Microarray for Time-Resolved Diagnosis and Prognosis of COVID-19

Peiyan Zheng <sup>1,†</sup>, Baolin Liao <sup>2,†</sup>, Jiao Yang <sup>3</sup>, Hu Cheng <sup>3,4</sup>, Zhangkai J. Cheng <sup>1</sup>, Huimin Huang <sup>1</sup>, Wenting Luo <sup>1</sup>, Yiyue Sun <sup>3,4</sup>, Qiang Zhu <sup>5</sup>, Yi Deng <sup>3,4</sup>, Lan Yang <sup>3</sup>, Yuxi Zhou <sup>3</sup>, Wenya Wu <sup>3,4</sup>, Shanhui Wu <sup>1</sup>, Weiping Cai <sup>2</sup>, Yueping Li <sup>2</sup>, Xiaoneng Mo <sup>2</sup>, Xinghua Tan <sup>2</sup>, Linghua Li <sup>2</sup>, Hongwei Ma <sup>3,\*</sup> and Baoqing Sun <sup>1,\*</sup>

<sup>1</sup> Department of Clinical Laboratory, National Center for Respiratory Medicine, National Clinical Research Center for Respiratory Disease, State Key Laboratory of Respiratory Disease, Guangzhou Institute of Respiratory Health, The First Affiliated Hospital of Guangzhou Medical University, Guangzhou 510120, China

<sup>2</sup> Guangzhou Institute of Clinical Medicine of Infectious Diseases, Guangzhou Eighth People's Hospital, Guangzhou Medical University, Guangzhou 510440, China

<sup>3</sup> Division of Nanobiomedicine, Suzhou Institute of Nano-Tech and Nano-Bionics, Chinese Academy of Sciences, Suzhou 215123, China

<sup>4</sup> Nano Science and Technology Institute, University of Science and Technology of China, Suzhou 215123, China

<sup>5</sup> State Key Laboratory of Respiratory Disease, Guangzhou Institutes of Biomedicine and Health Chinese Academy of Sciences, Guangzhou 510530, China

\* Correspondence: hwma2008@sinano.ac.cn (H.M.); sunbaoqing@vip.163.com (B.S.)

† These authors contributed equally to this work.

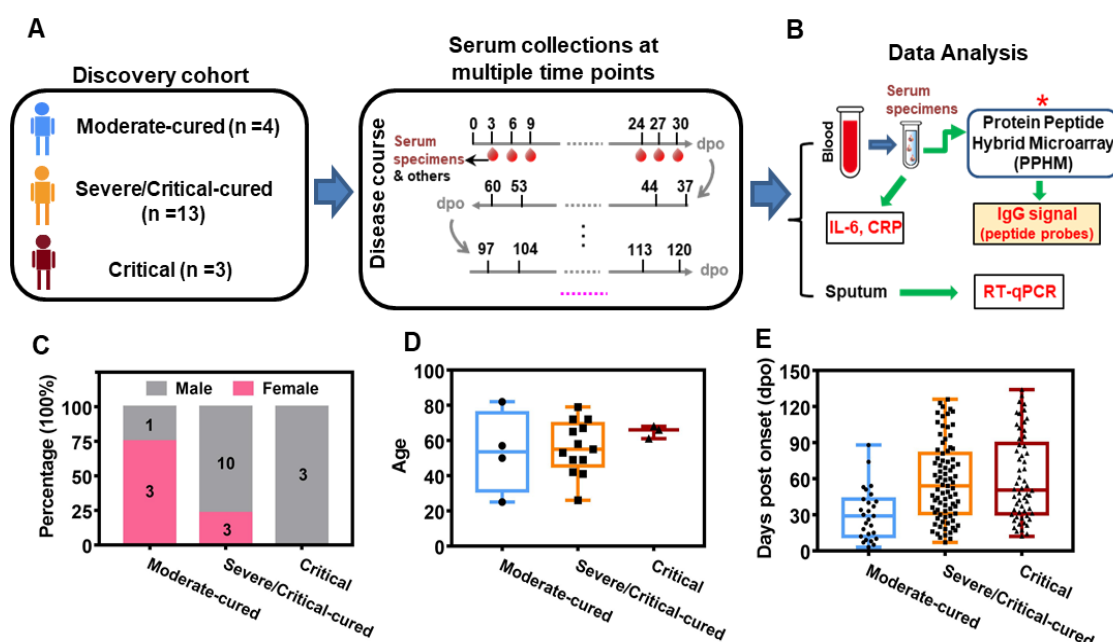

**Figure S1. Study strategy and basic information about the COVID-19 patients.** (A) Three groups of COVID-19 patients were identified in the discovery cohort (left), for which we had a total of 323 serum samples and other samples (e.g., ~ 500 sputum samples) collected throughout the disease course of patients, the serum samples were sampled as indicated (right). Briefly, the collection of serum sample was performed starting from patient admission to the hospital and continued until the days close to patient discharge. The time interval for serum collections was 3~4 days for the first 30 days, and about once a week afterwards. Note that the disease course for some of the patients in the critical group lasted up to ~120 days or even longer since the days post onset (d.p.o.). (B) A Part of the collected serum samples were assessed for examining IL-6 and CRP levels. All of the serum samples were monitored for the presence of antibodies against whole protein and/or peptide probes derived from SARS-CoV-2 proteins using a protein peptide hybrid microarray (PPHM). For sputum samples, quantitative reverse transcription PCR (RT-qPCR) test was performed for the diagnosis of SARS-CoV-2. (C) The gender distribution for the identified three groups of COVID-19 patients. (D) The age distribution for each group. The center line in each box represents the median age. (E) The number of days between symptom onset and the serum sample collections at different time points for three different patient groups from the discovery cohort. Each data point indicates the d.p.o. of a single patient at each time point. The center line in each box shows the median d.p.o.; the bottom and top lines represent the minimal and maximal d.p.o. in each patient group, respectively.

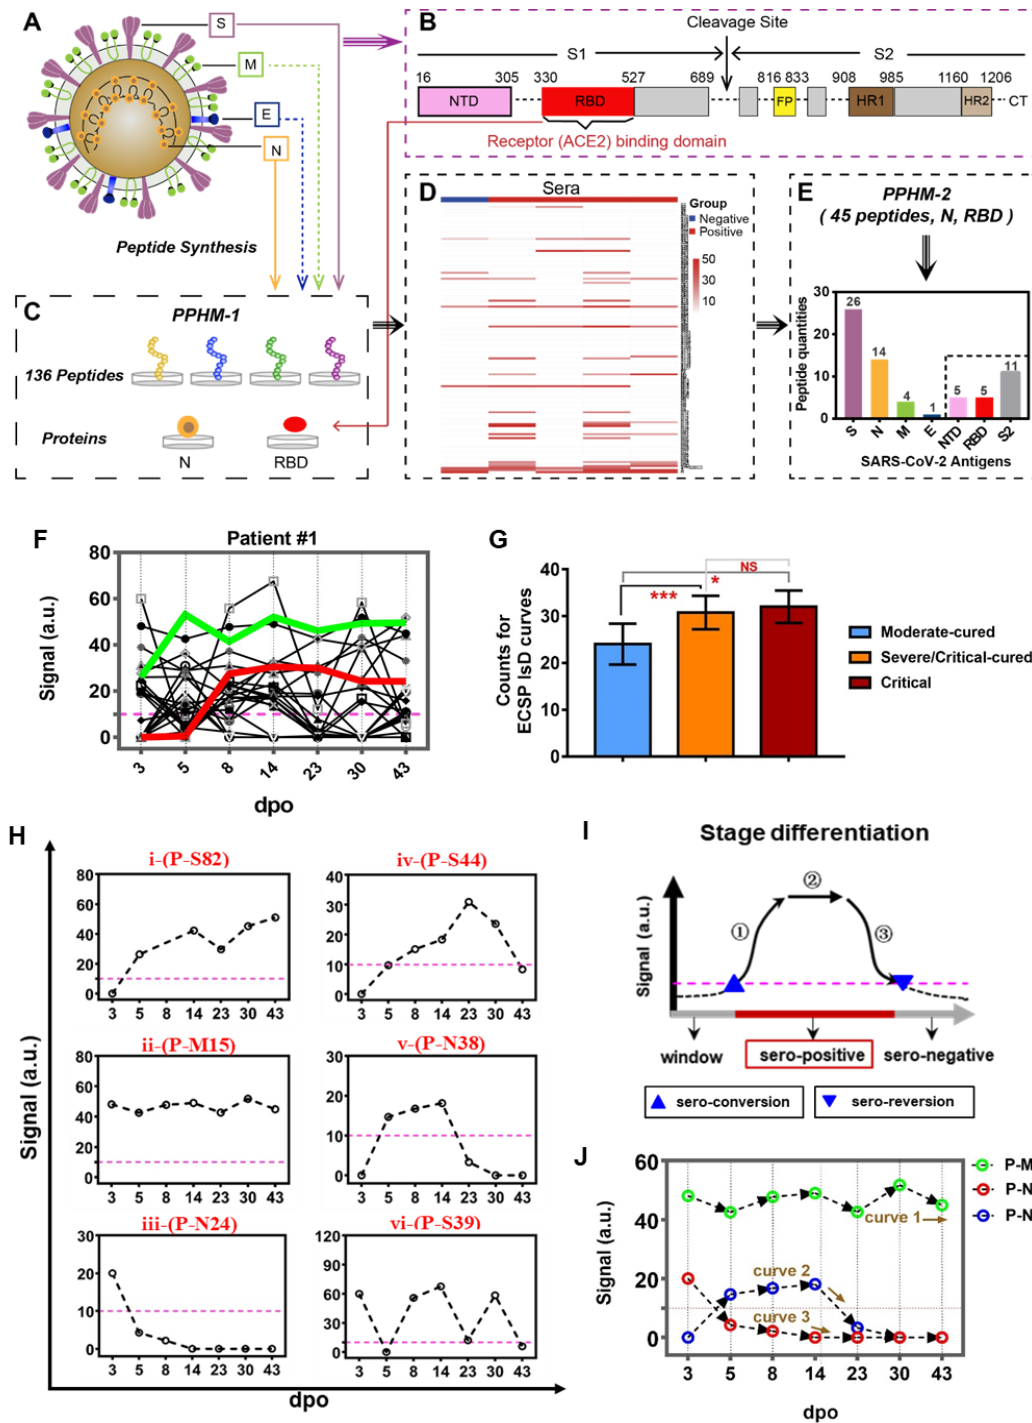

**Figure S2. Multiple phases of sero-antibody dynamics (MPAD) are evident in PPHM screening results.**

(A-E) Two-level PPHM screening process. (A) The structural proteins of SARS-CoV-2. (B) Schematic of the SARS-CoV-2 S protein structure, emphasizing the RBD (receptor binding domain, red). (C) PPHM-1 comprises the screening probes of 136 peptides and two proteins (N and RBD) for the first level

screening. **(D)** A heat map representing the first level screening of five serum samples: one negative sample from a healthy donor (blue region on top left), and four samples from COVID-19 patients (red region on top). **(E)** PPHM-2 comprises 45 peptides which were identified as the potential “epitope containing short peptides” (ECSPs) of SARS-CoV-2 through the first level screening; these peptides were used for the second level screening to detect the IgG levels of a large longitudinal serum samples from the discovery cohort over time. The quantified levels of potential ECSPs (originating from each viral protein) for the detection of SARS-CoV-2 Linear B cell epitopes are displayed with colored columns. **(F)** The protein and ECSP “IgG sero dynamic” (IsD) curves in Patient #1. The protein IsD curves of the N protein (green curve), RBD (red curve); and 22 ECSP IsD curves of ECSPs originating from four structural proteins of SARS-CoV-2 (black curves). The signal threshold is presented as a pink dashed line. **(G)** Comparison of the counts for the ECSP IsD curves in three different patient groups. Student’s t-tests were used to assess differences among groups; \* indicates  $p < 0.05$ ; \*\* indicates  $p < 0.01$ ; \*\*\* indicates  $p < 0.001$ . **(H)** Representative six different types of ECSP IsD curves for Patient #1: **(H-i)** a rising curve; **(H-ii)** an almost straight line; **(H-iii)** a declining curve; **(H-iv)**, **(H-v)**, and **(H-vi)** are ECSP IsD curves representative of more than one changing trend, i.e., combinations with rising curves, straight lines, and/or declining curves. **(I)** The three stages of the antibody life cycle (Long et al., 2020). **(J)** Miniature “multiple phases of sero-antibody dynamics” (MPAD) mining in the IsD curves of Patient #1. Three different ECSP IsD curves were randomly selected from Fig. 2H.

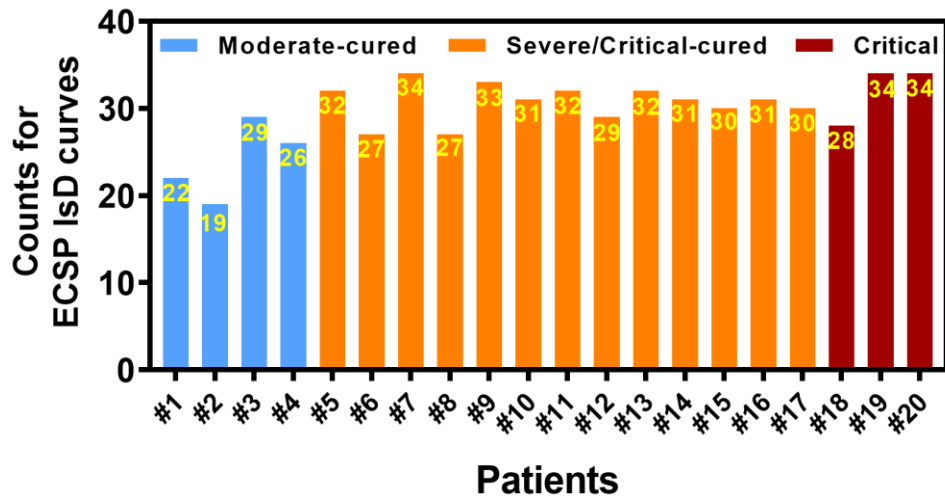

**Figure S3.** The counts for the ECSP IsD curves in each COVID-19 patient from the discovery cohort. The ECSP IsD curves for each patient were counted based on the PPHM-2 screening results. The quantity for the counts of the ECSP IsD curves in each patient was displayed on the top of each column.

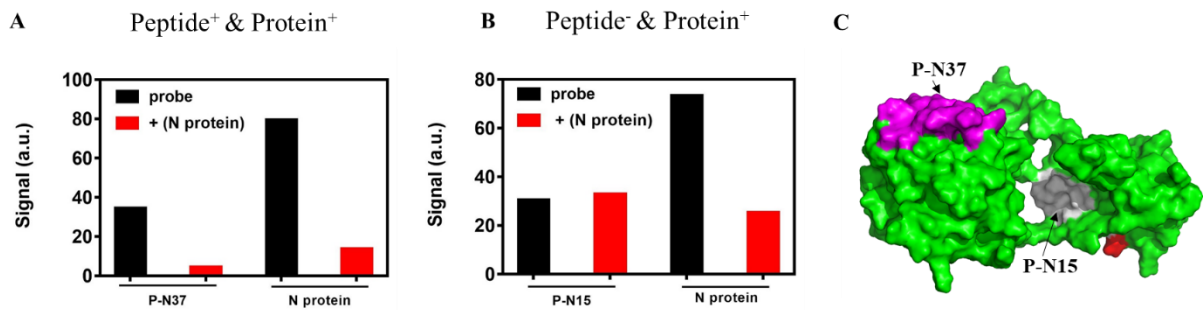

**Figure S4. N protein blocking experiment.** Free N protein was individually added to (A) the serum specimen of Patient #10 at 70 dpo and (B) the serum specimen of Patient #15 at 63 dpo before screening against PPHM-2. (A) Both anti-(P-N37) IgG and anti-(N protein) IgG were blocked by free N protein; (B) N protein can not block the signal values of anti-(P-N15) IgG, but can block the signal values of anti-(N protein) IgG. (C) The surface presentation of SARS-CoV-2 N protein (<https://zhanglab.cmb.med.umich.edu/COVID-19/>, QHD43423.pdb). P-N37 (purple) is exposed at the protein surface and P-N15 (grey part) is majorly buried inside of the protein.

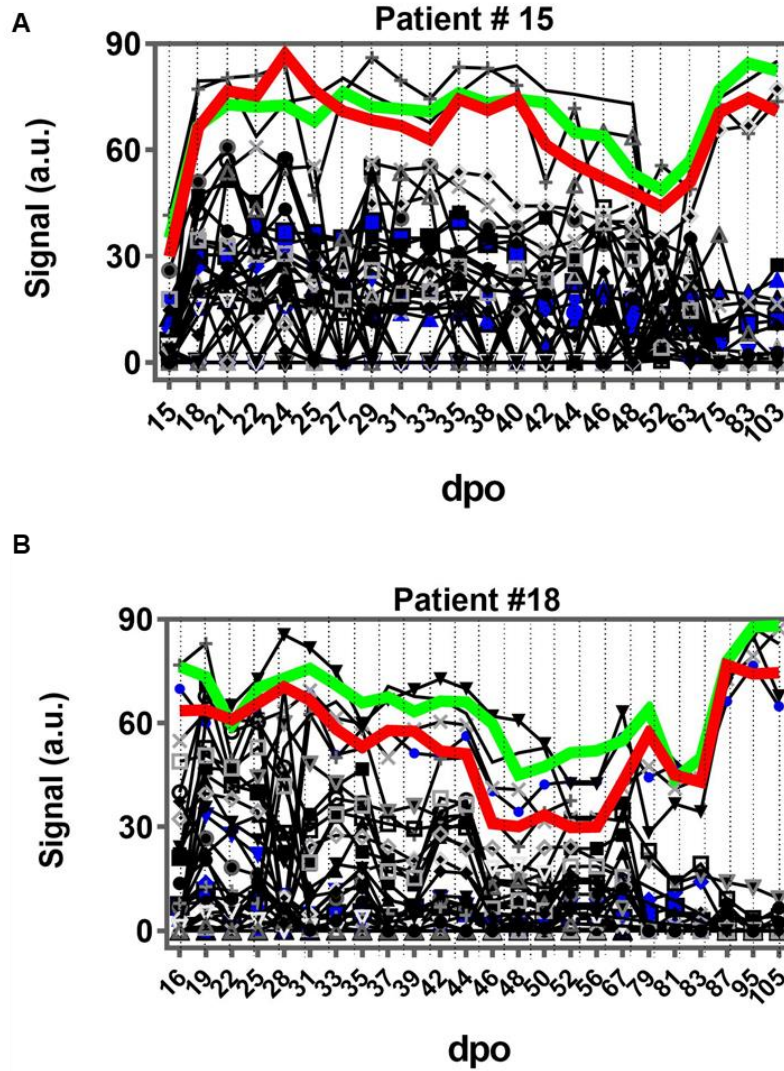

**Figure S5.** The “multiple phases of antibody sero-dynamics” (MPAD) in two representative COVID-19 patients. **(A)** The MPAD (within ~ 100 dpo) in Patient #15 who is from Severe/Critical-cured patient group. **(B)** The MPAD (within ~ 100 dpo) in Patient # 18 who is from the Critical patient group. The MPAD comprises the protein IsD curves of the N protein (green), RBD protein (red) and the ECSP IsD curves (black).

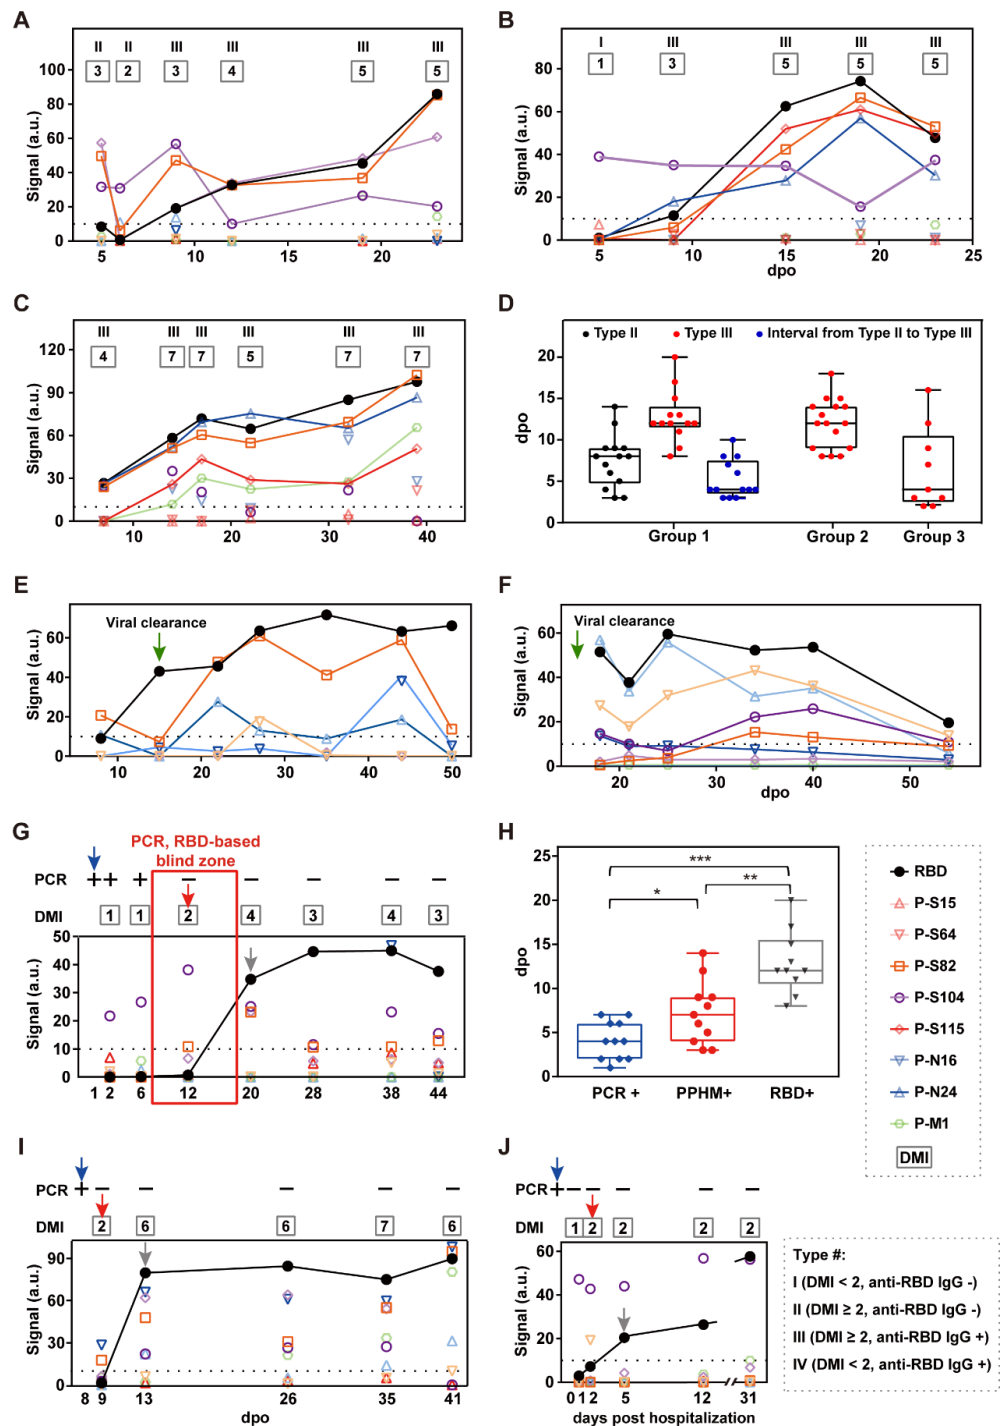

**Figure S6. Some anti-ECSP IgGs showed earlier sero-conversion than anti-RBD IgG and some anti-ECSP IgGs are short lived compared with anti-RBD IgGs. (A)** According to appearing sequence of the four type results of PPHM COVID-19 assay, the quarantine cohort can be divided into three groups. Patient #E7 representing Group 1 showed Type #2 and Type #3 results. **(B)** Patient #E15 representing

Group 2 showed Type #1 and Type #3 results. **(C)** Patient #E36 representing Group 3 showed only Type #3 results. **(D)** The distribution of three d.p.o.: i) when first appearance of Type #2, ii) Type #3 results, and iii) the difference between i and ii for each patient. **(E)** The group as represented by Patient #E12 showed some anti-ECSP IgGs are short lived compared with anti-RBD IgGs. **(F)** Patient #3 showed anti-ECSP IgGs and anti-RBD IgGs were nearly eliminated or obviously declining within the observation period after viral clearance. The red arrow indicating viral absence. **(G)** Symptomatic patient #E5 sequentially showed positive results for PCR, PPHMCOVID-19, and RBD-based serological assays, revealing a “blind zone” existed in this patient’s clinical data for an 8-day period if using PCR and RBD-based serological assays. **(H)** Distribution of the d.p.o.s of the first positive results for three assays in 11 symptomatic patients who had at least two PCR positive results. Representative cases of total 25 patients who showed only one PCR positive result, **(I)** symptomatic patient #E1 and **(J)** asymptomatic patient #E44, indicating the end of detecting zone of PCR test.



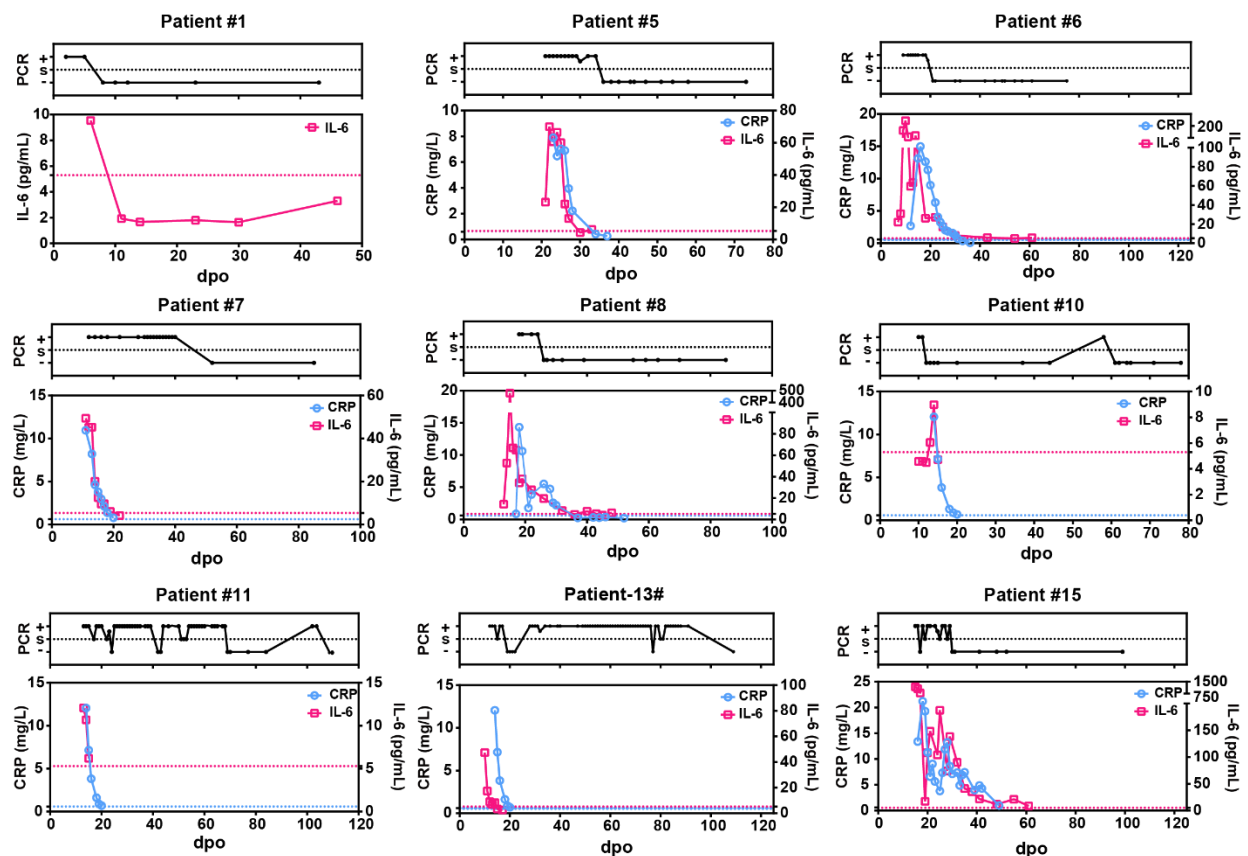

**Figure S7. The dynamic curves of CRP and IL-6 in individual patient.** We tracked the dynamic changes of infection-related biomarkers IL-6 (mauve) and CRP (blue) in each patient. The patients presented here were all recovered from the disease. Based on their PCR data, we found that all the PCR results finally turned as negative, which indicated the disease recovery and was consistent with their disease outcomes. The serum levels of IL-6 and/or CRP all dropped (near) to the normal level in these patients, indicating the good prognosis as well. The threshold for normal levels of IL-6 and CRP are presented with dashed lines of the corresponding color.

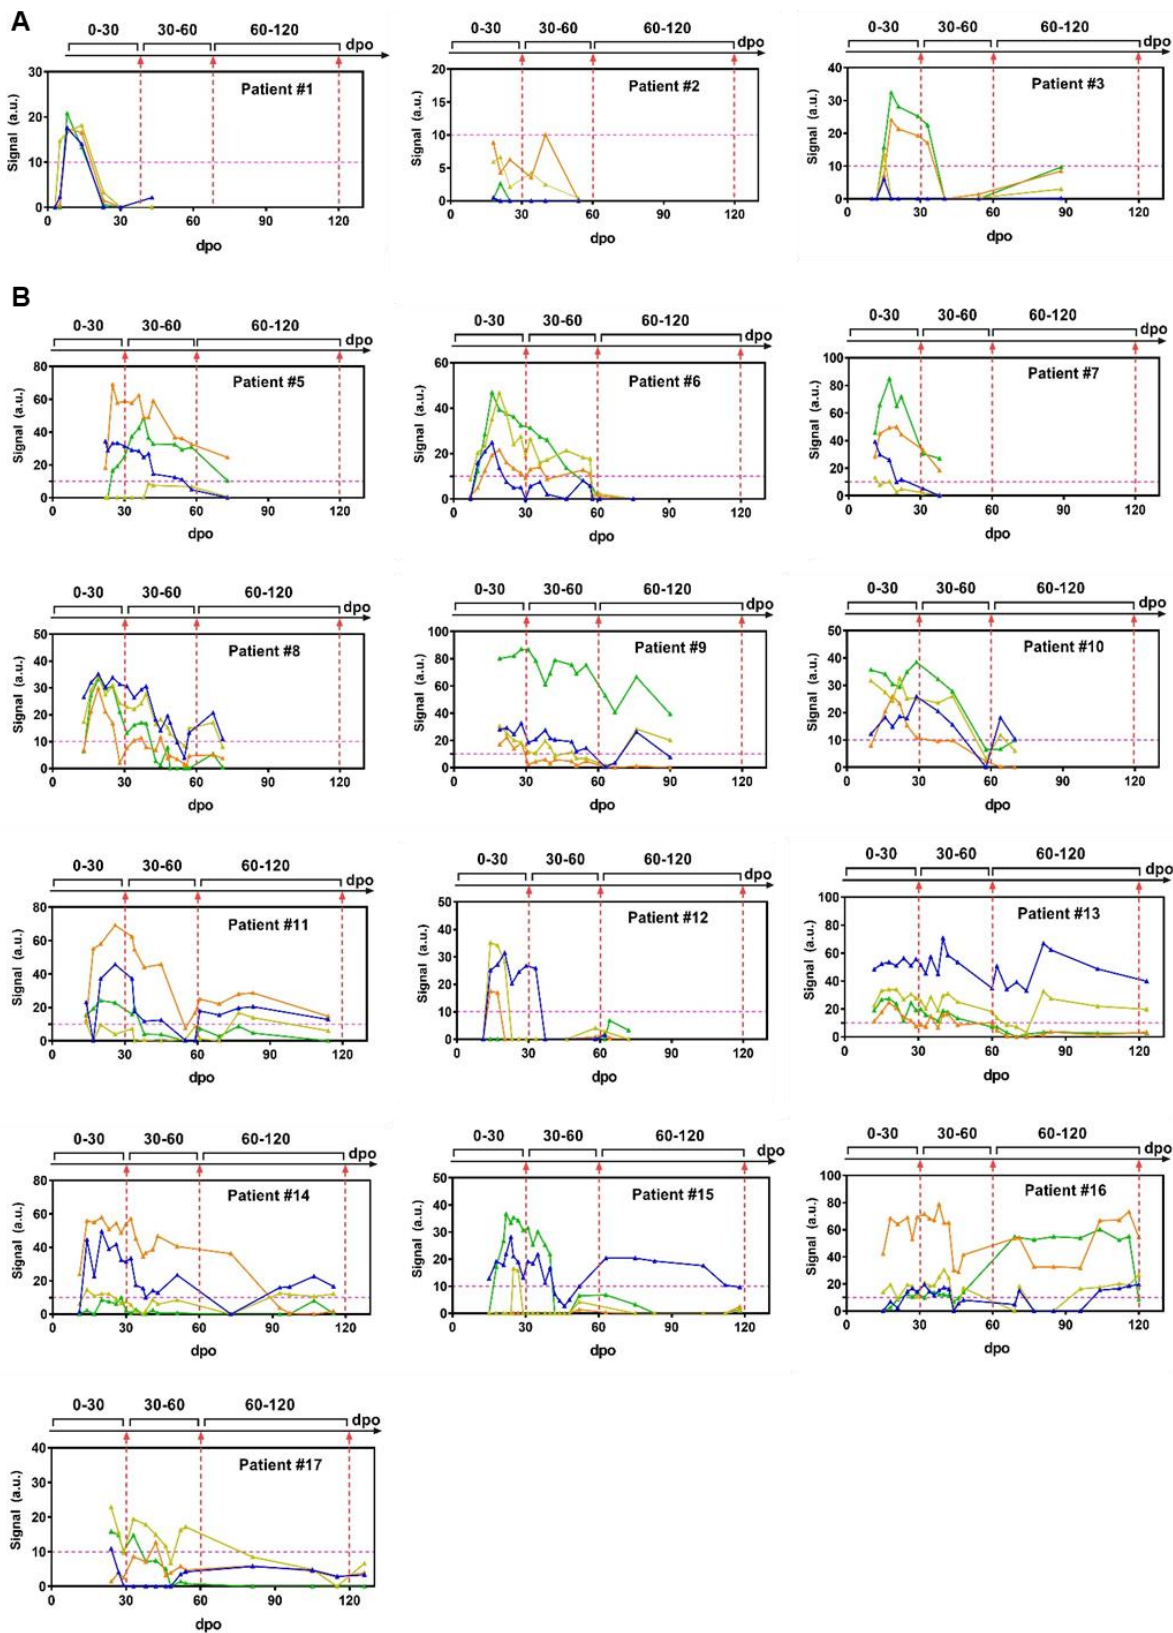

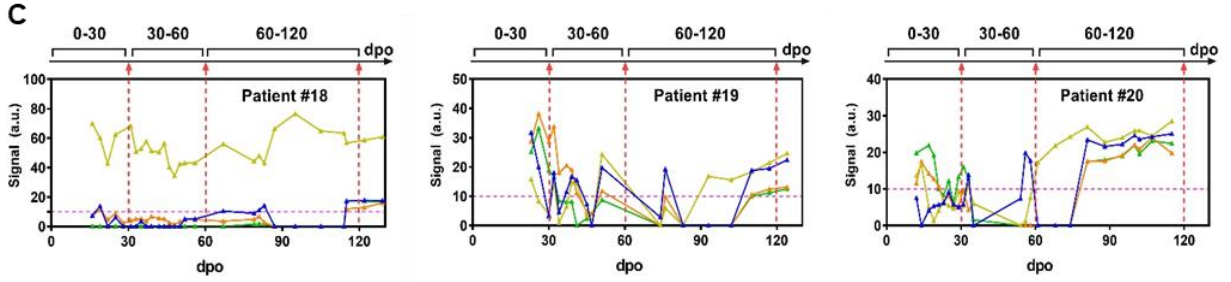

**Figure S8. The ECSP IsD curves of P-N37~P-N40 in individual patient.** The P-N37~P-N40 IsD curves of 19 COVID-19 patients were individually examined. The characteristics of the ECSP IsD curves of P-N37~P-N40 for each patient were consistent with the previous descriptions of the corresponding patient group, as shown in Fig. 3C and Fig. 3D. A (Moderate-cured group); B (Severe/Critical-cured group); C (Critical group).

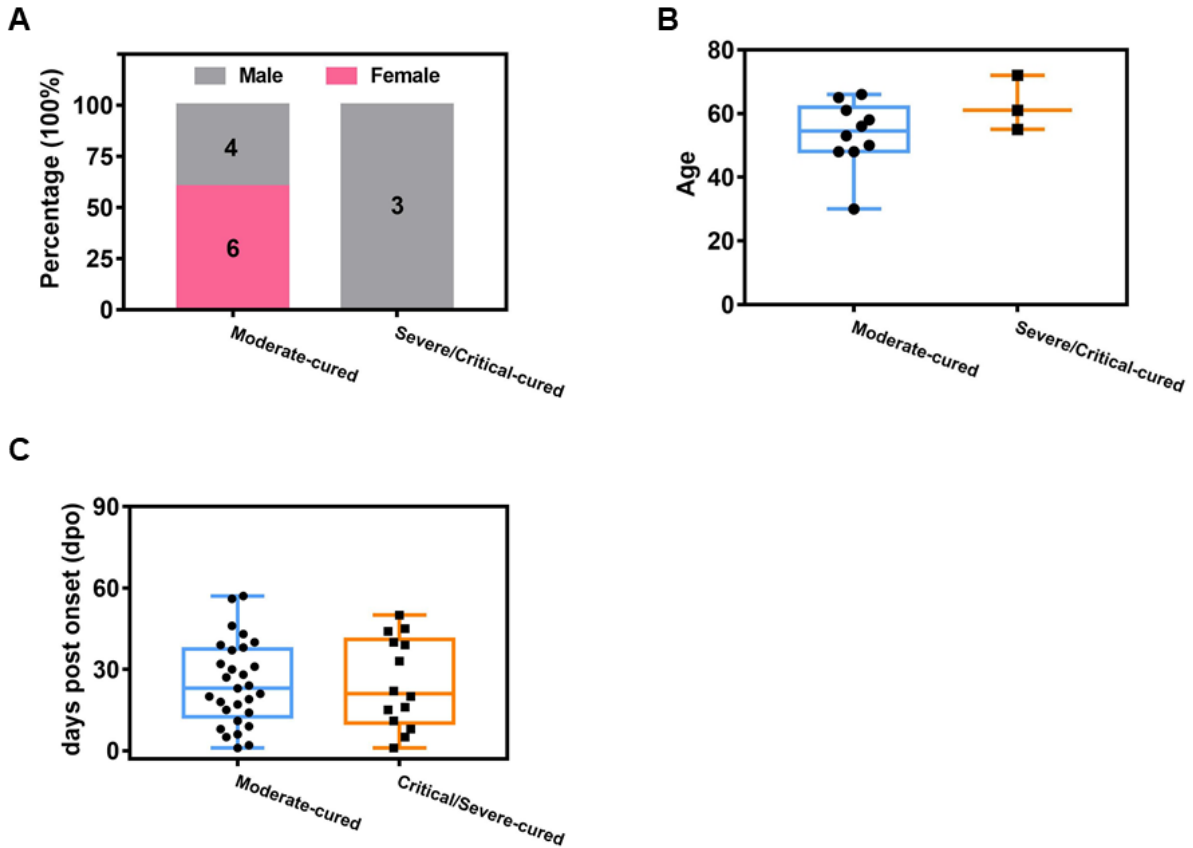

**Figure S9. The basic information for patients in training group.** (A) The gender distribution for the patients. (B) The age distribution for each group. The center line in each box represented the median age. (C) The number of days between symptom onset and the serum specimen collections at different time points for two different patient groups. Each data point indicates the dpo of a single patient at each time point. The center line in each box shows the median dpo; the bottom and top lines represent the minimal and maximal dpo in each patient group, respectively.

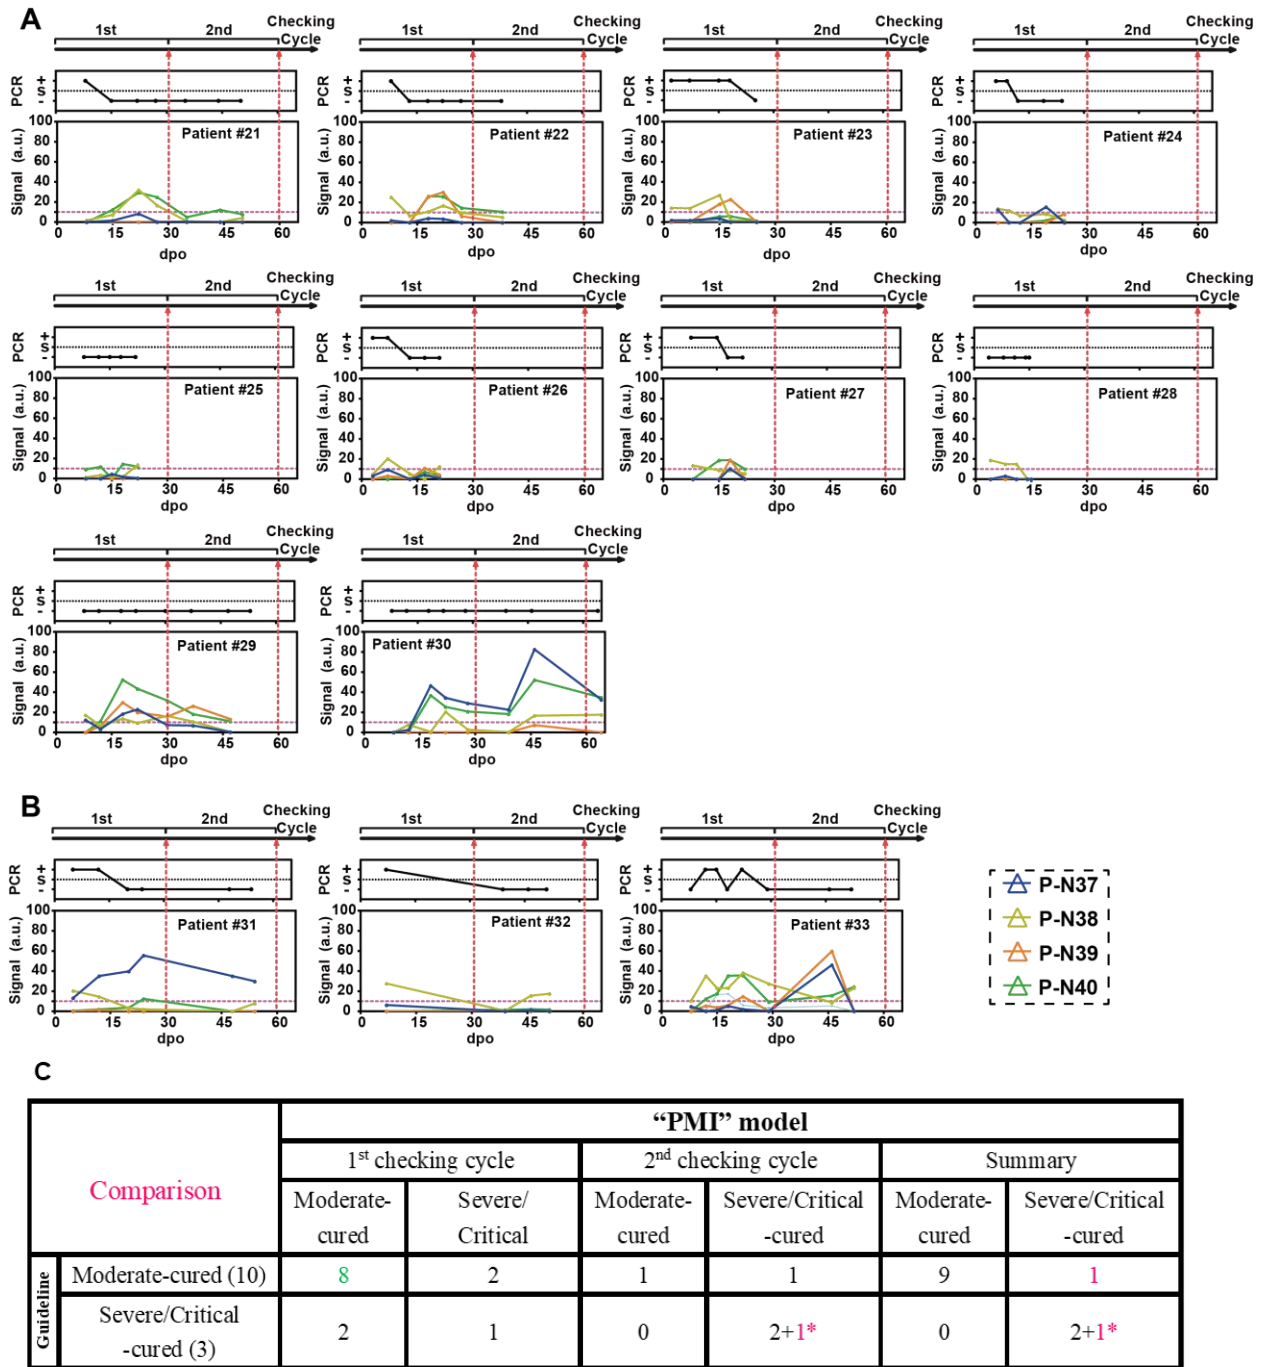

**Figure S10. The ECSP IsD curves of P-N37~P-N40 in individual patient from the training group.** The PCR result was tracked throughout the disease course for each patient and presented on the top of each panel; while the ECSP IsD curves of P-N37~P-N40 were presented on the bottom of each panel, and the first two checking cycles (1<sup>st</sup> checking cycle: 0-30 dpo; 2<sup>nd</sup> checking cycle: 30-60 dpo) were also identified in individual patient. Except for Patient #30, the other patients all passed through the examinations based on the standards of our “PMI” model. (A), the patients from the “Moderate-cured” group; (B), the

patients from the “Severe/Critical-cured” group. (C) Table for comparison of guideline-based vs. PMI Model-based time-resolved diagnosis of disease progression and prognosis. The green number indicates patients which did not require further examinations when using the “PMI” Model; and pink numbers present the one exception compared with guideline (whose real disease progression is in accord with our model); “pink\*” presents the one who needs further examinations.

**Table S1. Demographic characteristics of the quarantine cohort**

|                           | All<br>60   | Asymptomatic<br>18 (30.0%) | Moderate<br>33 (55.0%) | Severe/critical<br>9 (15.0%) | P value |
|---------------------------|-------------|----------------------------|------------------------|------------------------------|---------|
| <b>Age</b>                | 44.68±17.23 | 31.83±15.51                | 47.30±14.66            | 60.78±11.30                  | 1.2E-04 |
| <b>Gender</b>             |             |                            |                        |                              |         |
| Female                    | 28 (46.7%)  | 11 (18.3%)                 | 16 (26.7%)             | 1 (1.7%)                     | 4.7E-02 |
| Male                      | 32 (53.3%)  | 7 (11.7%)                  | 17 (28.3%)             | 8 (13.3%)                    |         |
| <b>Signs and symptoms</b> |             |                            |                        |                              |         |
| Fever                     | 33 (55.0%)  | 0 (0.0%)                   | 25 (41.7%)             | 8 (13.3%)                    | 6.6E-01 |
| Fatigue                   | 15 (25.0%)  | 0 (0.0%)                   | 8 (13.3%)              | 7 (11.7%)                    | 5.5E-03 |
| Dry cough                 | 24 (40.0%)  | 0 (0.0%)                   | 17 (28.3%)             | 7 (11.7%)                    | 2.6E-01 |
| Headache                  | 5 (8.3%)    | 0 (0.0%)                   | 5 (8.3%)               | 0 (0.0%)                     | 5.7E-01 |
| Diarrhea                  | 1 (1.7%)    | 0 (0.0%)                   | 1 (1.7%)               | 0 (0.0%)                     | 1.0E+00 |
| Pharyngalgia              | 2 (3.3%)    | 0 (0.0%)                   | 2 (3.3%)               | 0 (0.0%)                     | 1.0E+00 |
| Dyspnea                   | 7 (11.7%)   | 0 (0.0%)                   | 3 (5.0%)               | 4 (6.7%)                     | 2.8E-02 |
| <b>Onset of symptom</b>   | 5.81±3.07   | NA                         | 5.12±2.41              | 8.33±4.00                    | 2.2E-02 |
| <b>Hospital admission</b> | 18.07±8.88  | 9.44±6.05                  | 21.15±6.18             | 24.00±10.27                  | 3.2E-06 |
| <b>Corticosteroids</b>    | 9 (15.0%)   | 0 (0.0%)                   | 5 (8.3%)               | 4 (6.7%)                     | 5.8E-02 |

"Gender", "Dyspnea", “Onset of symptom”: significant difference, p-value < 0.05

"Age", "Fatigue", “Hospital admission”: extremely significant difference, p-value < 0.01

The Fisher’s exact test or chi-squared test were used to compare qualitative data and the Wilcoxon rank sum test or Kruskal–Wallis H test were used for comparison continuous data.

**Table S2. Peptide information of PPHM-1**

| Peptide | Position  | Sequence              | Peptide | Position  | Sequence              |
|---------|-----------|-----------------------|---------|-----------|-----------------------|
| P-S2    | 11-13     | VSSQCVNLTRTQLPPAYTN   | P-S102  | 1011-1030 | QLIRAAEIRASANLAATKMS  |
| P-S3    | 21-40     | RTQLPPAYTNSFTRGVVYPD  | P-S103  | 1021-1040 | SANLAATKMSECVLGQSKRV  |
| P-S4    | 31-50     | SFTRGVVYPDKVFRSSVLHS  | P-S104  | 1031-1050 | ECVLGQSKRVDFCGKGYHLM  |
| P-S5    | 41-60     | KVFRSSVLHSTQDLFLPFFS  | P-S105  | 1041-1060 | DFCGKGYHLMSPFQSAPHGV  |
| P-S6    | 51-70     | TQDLFLPFFSNVTWFHAIHV  | P-S106  | 1051-1070 | SFPQSAPHGVVFLHVTYVPA  |
| P-S7    | 61-80     | NVTWFHAIHVSGTNGTKRFD  | P-S107  | 1061-1080 | VFLHVTYVPAQEKNFTTAPA  |
| P-S8    | 71-90     | SGTNGTKRFDNPVLPFNDGV  | P-S108  | 1071-1090 | QEKNFTTAPAICHDGKAHFP  |
| P-S10   | 91-110    | YFASTEKSNIRGWIFGTTL   | P-S109  | 1081-1100 | ICHDGKAHFPREGVFSVNGT  |
| P-S14   | 131-150   | CEFQFCNDPFLGVYHKNK    | P-S110  | 1091-1110 | REGVFSVNGTHWVFTQRNFY  |
| P-S15   | 141-160   | LGVYHKNKNSWMESEFRVY   | P-S111  | 1101-1120 | HWVFTQRNFYEQIITDNT    |
| P-S18   | 171-190   | VSQPFLMDLEGKQGNFKNLR  | P-S114  | 1131-1150 | GIVNNTVYDPLQPELDSFKE  |
| P-S19   | 181-200   | GKQGNFKNLRREFVKNDGY   | P-S115  | 1141-1160 | LQPELDSFKEELDKYFKNHT  |
| P-S20   | 191-210   | EFVFNIDGYFKIYSKHTPI   | P-S116  | 1151-1170 | ELDKYFKNHTSPDVLGDIS   |
| P-S21   | 201-220   | FKIYSKHTPINLVRDLPGQF  | P-S118  | 1171-1190 | GINASVVNIQKEIDRLNEVA  |
| P-S22   | 211-230   | LNVRDLPGQFSALEPLVDLP  | P-S119  | 1181-1200 | KEIDRLNEVAKNLESIDL    |
| P-S24   | 231-250   | IGINTRFQTLALHRSYLT    | P-S120  | 1191-1210 | KNLESIDLQELGKYEQYI    |
| P-S25   | 241-260   | LLALHRSYLTPGDSSSGWTA  | P-S121  | 1201-1220 | QELGKYEQYIKWPWYIWLGF  |
| P-S27   | 261-280   | GAAAYYVGYLQPRTFLLKYN  | P-S127  | 1261-1273 | SEPVLGKGVKLHYT        |
| P-S29   | 281-300   | ENGTITDAVDCALDPLSETK  | P-E6    | 51-70     | LVKPSFYVYSRVKNLNSSRV  |
| P-S31   | 301-320   | CTLKSFTVEKGIVQTSNFRV  | P-E7    | 61-75     | RVKNLNSSRVDPDLLV      |
| P-S32   | 311-330   | GIYQTSNFRVQPTESIVRFP  | P-M1    | 1-20      | MADSNGTITVEELKKLEQW   |
| P-S34   | 331-350   | NITNLCPFGEVFNATRFASV  | P-M2    | 11-30     | EELKKLEQWNLVIGFLFLT   |
| P-S35   | 341-360   | VFNATRFASVYAWNRRKISN  | P-M4    | 31-50     | WICLLQFAYANRRFLYIK    |
| P-S36   | 351-370   | YAWNRRKISNCVADYSVLYN  | P-M11   | 101-120   | RLFARTRSMWSFNPETNILL  |
| P-S37   | 361-380   | CVADYSVLYNSASFSTFKCY  | P-M12   | 111-130   | SFNPETNILLNVPLHGTILT  |
| P-S38   | 371-390   | SASFSTFKCYGVSPTKLNDL  | P-M14   | 131-150   | RPLLESELVIGAVILRGHLR  |
| P-S39   | 381-400   | GVSPTKLNDLCFTNVYADSF  | P-M15   | 141-160   | GAVILRGHLRIAGHHLGRCD  |
| P-S41   | 401-420   | VIRGDEVQRQIAPGQTGKIAD | P-M16   | 151-170   | IAGHHLGRCDIKDLPKEITV  |
| P-S42   | 411-430   | APGQTKGIADYNYKLPDDFT  | P-M17   | 161-180   | IKDLPKEITVATSRTLSYYK  |
| P-S44   | 431-450   | GCVIAWNSNNLDSKVGGNYN  | P-M18   | 171-190   | ATSRTLSYYKLGASQVRVAGD |
| P-S45   | 441-460   | LDSKVGGNYNLYRFRKSN    | P-M19   | 181-200   | LGASQVRVAGDSGFAAYSRYR |
| P-S46   | 451-470   | YLRLFRKSNLKPFERDIST   | P-M20   | 191-210   | SGFAAYSRYRIGNYKLNTDH  |
| P-S48   | 471-490   | EIQAGSTPCNGVEGFNCYF   | P-M21   | 201-220   | IGNYKLNTDHSSSDNIALL   |
| P-S49   | 481-500   | NGVEGFNCYFPLQSYGFQPT  | P-N2    | 11-30     | NAPRITFGGPDSTGSNQNG   |
| P-S50   | 491-510   | PLQSYGFQPTNGVGYQPYRV  | P-N3    | 21-40     | SDSTGSNQNGERSGARSQQR  |
| P-S51   | 501-520   | NGVGYPYRVVLSFELLHA    | P-N5    | 41-60     | RPQGLPNNTASWFTALTQHG  |
| P-S52   | 511-530   | VVLSFELLHAPATVCGPKKS  | P-N6    | 51-70     | SWFTALTQHGKEDLKFPRGQ  |
| P-S53   | 521-540   | PATVCGPKKSTNLVKNKCVN  | P-N7    | 61-80     | KEDLKFPRGQGVPIINTSSP  |
| P-S54   | 531-550   | TNLVKNKCVNFENGLTGTG   | P-N8    | 71-90     | GVPIINTSSPDDQIGYRRA   |
| P-S55   | 541-560   | FNENGLTGTGVLTESNKKFL  | P-N10   | 91-110    | TRRIRGGDGKMKDLSRWFYF  |
| P-S56   | 551-570   | VLTESNKKFLPFQQFGRDIA  | P-N11   | 101-120   | MKDLSRWFYFYLYLTGPEAG  |
| P-S57   | 561-580   | PFQQFGRDIADTTDAVRDPQ  | P-N12   | 111-130   | YYLTGPEAGLPYGANKDGI   |
| P-S58   | 571-590   | DTTDAVRDPQTLEILDITPC  | P-N13   | 121-140   | LPYGANKDGIWVATEGALN   |
| P-S61   | 601-620   | GTNTSNQVAVLYQDVNCTEV  | P-N14   | 131-150   | IWVATEGALNTPKDHIGTRN  |
| P-S62   | 611-630   | LYQDVNCTEVPVAIHADQLT  | P-N15   | 141-160   | TPKDHIGTRNPANNAIIVLQ  |
| P-S63   | 621-640   | PVAIHADQLTPTWRVYSTGS  | P-N16   | 151-170   | PANNAIIVLQLPQGTTLPKG  |
| P-S64   | 631-650   | PTWRVYSTGSNVFQTRAGCL  | P-N17   | 161-180   | LPQGTTLPKGFYAEGSRGGS  |
| P-S66   | 651-670   | IGAETHVNSYECDIPIGAGI  | P-N19   | 181-200   | QASSRSSSRNSSRNSTPG    |
| P-S68   | 671-690   | CASYQTQTNSPRRARSVASQ  | P-N20   | 191-210   | RNSSRNSTPGSSRGTSARM   |
| P-S69   | 681-700   | PRRARSVASQSIIAYTMSLG  | P-N21   | 201-220   | SSRGTSARMAGNGGDAALA   |
| P-S76   | 751-770   | NLLQYGSFCTQLNRALTGI   | P-N22   | 211-230   | AGNGGDAALALLLDRLNQL   |
| P-S78   | 771-790   | AVEQDKNTQEVFAQVKQIYK  | P-N23   | 221-240   | LLLDRLNQLSKMSGKGQQ    |
| P-S79   | 781-800   | VFAQVKQIYKTPPIKDFGGF  | P-N24   | 231-250   | ESKMSGKGQQQQGQTVTKKS  |
| P-S80   | 791-810   | TPPIKDFGGFNFSQILPDPS  | P-N25   | 241-260   | QQGQTVTKKSAEASKKPRQ   |
| P-S82   | 811-830   | KPSKRSFIEDLLFNKVTLD   | P-N26   | 251-270   | AAEASKKPRQKRTATKAYNV  |
| P-S83   | 821-840   | LLFNKVTLDAGFIKQYGDC   | P-N27   | 261-280   | KRTATKAYNVTAQFRRGPE   |
| P-S84   | 831-850   | AGFIKQYGDCLGDIARDLI   | P-N28   | 271-290   | TQAFRRGPEQTQGNFGDQE   |
| P-S85   | 841-860   | LGDIARDLICAQKFNGLTV   | P-N29   | 281-300   | QTQGNFGDQELIRQGTIDYKH |
| P-S86   | 851-870   | CAQKFNGLTVLPLLTDEMI   | P-N30   | 291-310   | LIRQGTIDYKHWQIAQFAPS  |
| P-S90   | 891-910   | GAALQIPFAMQMAYRFNGIG  | P-N31   | 301-320   | WPQIAQFAPSASAFFGMSRI  |
| P-S91   | 901-920   | QMAYRFNGIGVTQNVLYENQ  | P-N34   | 331-350   | LYTGAIKLDDKDPNFKDQV   |
| P-S92   | 911-930   | VTQNVLYENQKLIANQFNSA  | P-N35   | 341-360   | DKDPNFKDQVILLNKHIDAY  |
| P-S93   | 921-940   | KLIANQFNSAIGKIQDSLSS  | P-N36   | 351-370   | ILLNKHIDAYKTFPTEPKK   |
| P-S94   | 931-950   | IGKIQDSLSSASALGKLQD   | P-N37   | 361-380   | KTFPTEPKKDKKKKADETO   |
| P-S95   | 941-960   | TASALGKLQDVVNQNAQALN  | P-N38   | 371-390   | DKKKKADETOALPQRQKQQ   |
| P-S96   | 951-970   | VVNQNAQALNVLQQLSSNF   | P-N39   | 381-400   | ALPQRQKKAQDTVTLPAADL  |
| P-S98   | 971-990   | GAISSVLNDILSRDLKVEAE  | P-N40   | 391-410   | TVTLPAADLDDFSKQLQSS   |
| P-S101  | 1001-1020 | LQSLQTYVTQQLIRAAEIRA  | P-N41   | 401-419   | DDFSKQLQSSMSADSTQA    |

**Table S3. Peptide information of PPHM-2 (partial peptides from PPHM-1)**

| Peptide | Position  | Sequence                |
|---------|-----------|-------------------------|
| P-S4    | 31-50     | SFTRGVYYPDKVFRSSVLHS    |
| P-S7    | 61-80     | NVTWFHAIHVSGTNGTKRFD    |
| P-S15   | 141-160   | LGVYYHKNNKSWMESEFRVY    |
| P-S21   | 201-220   | FKIYSKHTPINLVRDLPQGF    |
| P-S31   | 301-320   | CTLKSFTVEKGIYQTSNFRV    |
| P-S37   | 361-380   | CVADYSVLYNSASFSTFKCY    |
| P-S39   | 381-400   | GVSP TKLNDLCFTNVYADSF   |
| P-S44   | 431-450   | GCVIAWNSNNLDSKVGGNYN    |
| P-S52   | 511-530   | VVLSFELLHAPATVCGPKKS    |
| P-S53   | 521-540   | PATVCGPKKSTNLVKNKCVN    |
| P-S56   | 551-570   | VLTESNKKFLPFQQFGRDIA    |
| P-S57   | 561-580   | PFQQFGRDIADTTDAVRDPQ    |
| P-S58   | 571-590   | DTTDAVRDPQTLEILDITPC    |
| P-S63   | 621-640   | PVAIHADQLTPTWRVYSTGS    |
| P-S64   | 631-650   | PTWRVYSTGSNVFQTRAGCL    |
| P-S69   | 681-700   | PRRARSVASQSIAYTMSLG     |
| P-S78   | 771-790   | AVEQDKNTQEVFAQVKQIYK    |
| P-S82   | 811-830   | KPSKRSFIEDLLFNKVTLAD    |
| P-S83   | 821-840   | LLFNKVTLADAGFIKQYGDC    |
| P-S95   | 941-960   | TASALGKLQDVVNQNAQALN    |
| P-S102  | 1011-1030 | QLIRAAEIRASANLAATKMS    |
| P-S104  | 1031-1050 | ECVLGQSKRVDFCGGYHLM     |
| P-S108  | 1071-1090 | QEKNF TTA PAICH DGKAHFP |
| P-S111  | 1101-1120 | HWFVTQRNFYEPQIITDNT     |
| P-S115  | 1141-1160 | LQPELDSFKEELDKYFKNHT    |
| P-S118  | 1171-1190 | GINASVVNIQKEIDRLNEVA    |
| P-E6    | 51-70     | LVKPSFYVYSRVKNLSSRV     |
| P-M1    | 43850     | MADSNGTITVEELKKLLEQW    |
| P-M15   | 141-160   | GAVILRGHLRIAGHHLGRCD    |
| P-M16   | 151-170   | IAGHHLGRCDIKDLPKEITV    |
| P-M17   | 161-180   | IKDLPKEITVATSRTLSYYK    |
| P-N15   | 141-160   | TPKDHIGTRNPANNAIVLQ     |
| P-N16   | 151-170   | PANNAIVLQLPQGTTLPKG     |
| P-N17   | 161-180   | LPQGTTLPKGFYAEGSRGGS    |
| P-N22   | 211-230   | AGNGGDAALALLLDRLNQL     |
| P-N23   | 221-240   | LLLDRLNQLESKMSGKGQQ     |
| P-N24   | 231-250   | ESKMSGKGQQQQGQTVTKKS    |
| P-N25   | 241-260   | QQGQTVTKKSAAEASKKPRQ    |
| P-N26   | 251-270   | AAEASKKPRQKRTATKAYNV    |
| P-N36   | 351-370   | ILLNKHIDAYKTFPPTPEKK    |
| P-N37   | 361-380   | KTFPPTPEKKDKKKKADETQ    |
| P-N38   | 371-390   | DKKKKADETQALPQRQKKQQ    |
| P-N39   | 381-400   | ALPQRQKKQQTVTLLPAADL    |
| P-N40   | 391-410   | TVTLLPAADLDDFSKQLQQS    |
| P-N41   | 401-419   | DDFSKQLQQSMSSADSTQA     |
